# Supplementary material for: The influence of HLA genotype on the development of metal hypersensitivity following joint replacement
Source: PubMed Central journal article supplement (PMC9232575; doi:10.1038/s43856-022-00137-0), 2022-06-24
Supplement: 43856_2022_137_MOESM4_ESM.pdf [file 43856_2022_137_MOESM4_ESM.pdf]

## **Description of Additional Supplementary Files**

**File Name:** Supplementary Data 1

**Description:** Raw genetic data of the extreme phenotype groups are included in Supplementary Data 1

**File Name:** Supplementary Data 2

**Description:** Supplementary Data 2 provides the source data for Figures 4, 5 and 6
